# Supplementary material for: SrFe1−xSnxO3−δ nanoparticles with enhanced redox properties for catalytic combustion of benzene
Source: Royal Society of Chemistry journal article supplement (doi:10.1039/d0cy01154a), 2020-01-01
Supplement: d0cy01154a1.pdf [file d0cy01154a1.pdf]

# *Supporting Information*

$\text{SrFe}_{1-x}\text{Sn}_x\text{O}_{3-\delta}$  nanoparticles with enhanced redox properties for catalytic  
combustion of benzene

Kazutaka Hashimoto,<sup>a</sup> Ryoichi Otomo,<sup>b,\*</sup> and Yuichi Kamiya<sup>b</sup>

<sup>a</sup> *Graduate School of Environmental Science, Hokkaido University, Kita 10 Nishi 5, Sapporo 060-0810, Japan.*

<sup>b</sup> *Faculty of Environmental Earth Science, Hokkaido University, Kita 10 Nishi 5, Sapporo 060-0810, Japan.*

Corresponding author:

Dr. Ryoichi Otomo

E-mail: otomo@ees.hokudai.ac.jp

Table S1 Lattice constant values for SrFe<sub>1-x</sub>Sn<sub>x</sub>O<sub>3-δ</sub> samples.

| Sample | $2\theta$ (degree) <sup>a</sup> | Lattice constant (Å) |          |          |
|--------|---------------------------------|----------------------|----------|----------|
|        |                                 | <i>a</i>             | <i>b</i> | <i>c</i> |
| SFO    | 32.77                           | 3.860                | 3.861    | 3.859    |
| SFSO25 | 32.26                           | 3.920                | 3.918    | 3.925    |
| SFSO50 | 31.76                           | 3.980                | 3.972    | 3.972    |
| SFSO75 | 31.54                           | 4.007                | 4.003    | 4.008    |
| SSO    | 31.33                           | 4.033                | 4.030    | 4.033    |

<sup>a</sup>Diffraction angle for the strongest line between 31 to 33°.

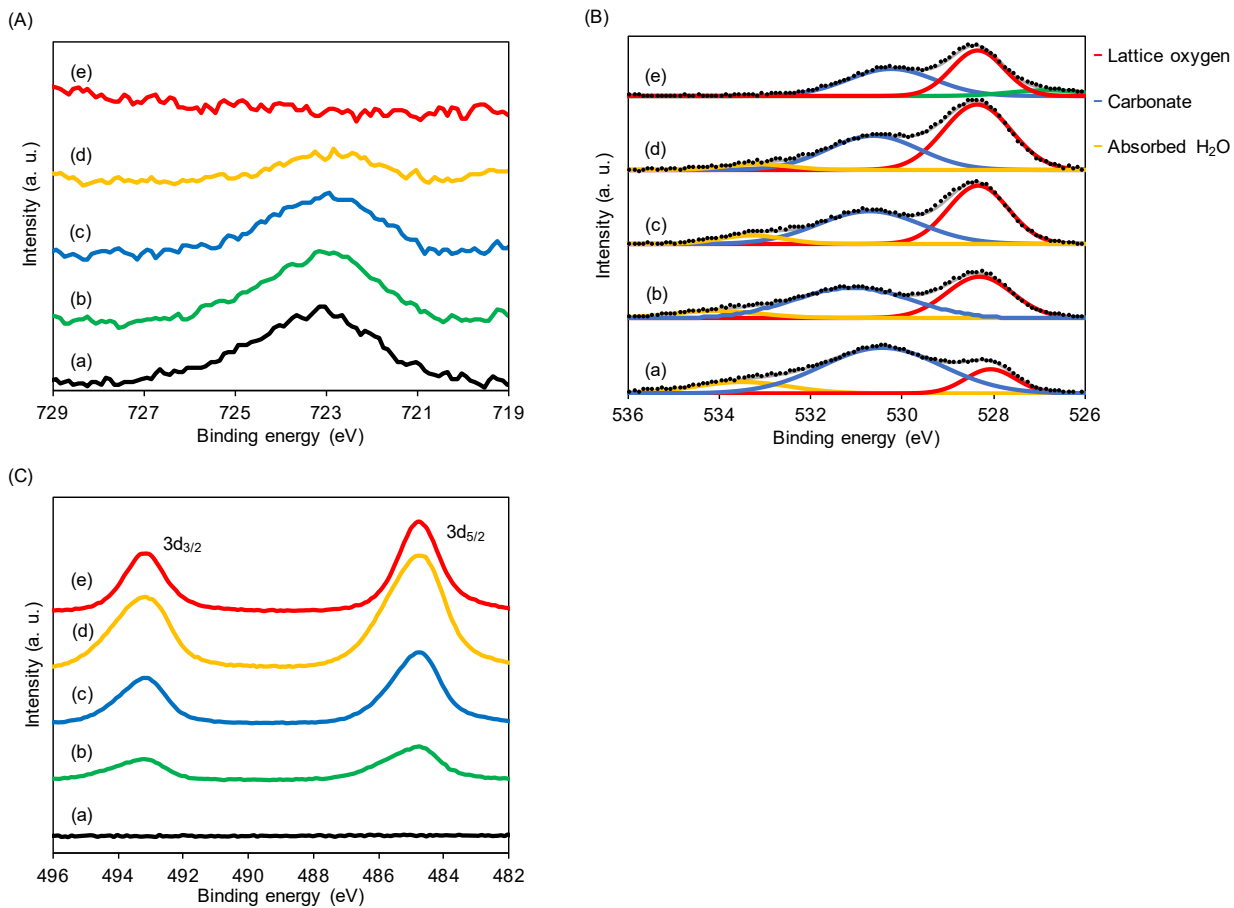

Fig. S1 X-ray photoelectron spectra of (a) SFO, (b) SFSO25, (c) SFSO50, (d) SFSO75, and (e) SSO. (A) Fe 2p<sub>1/2</sub>, (B) O 1s, and (C) Sn 3d orbitals.

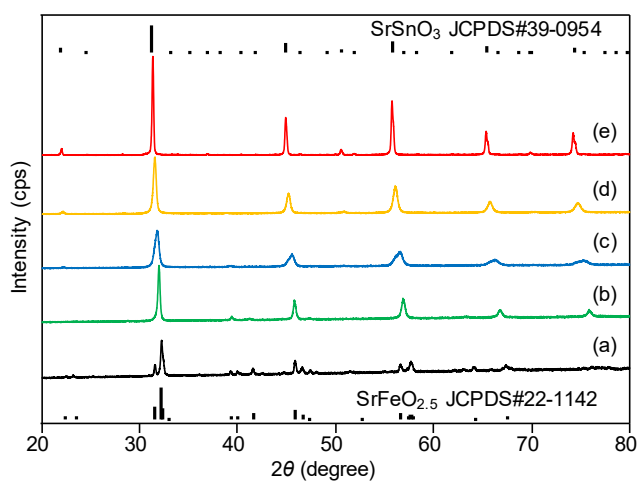

Fig. S2 XRD patterns of (a) SFO, (b) SFSO25, (c) SFSO50, (d) SFSO75, and (e) SSO after the measurement of  $\text{H}_2$ -TPR.

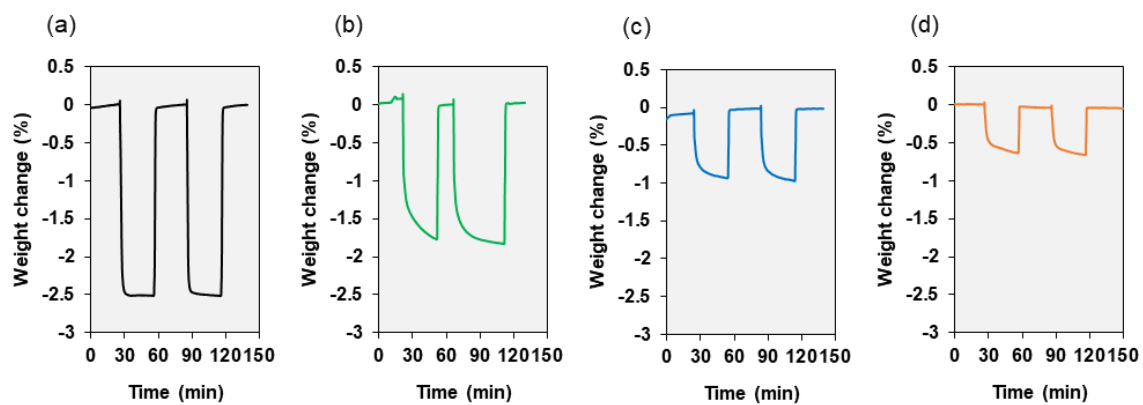

Fig. S3 TG profiles of  $\text{SrFe}_{1-x}\text{Sn}_x\text{O}_{3-\delta}$  obtained by alternately switching reductive/oxidative gas flow. (a) SFO, (b) SFSO25, (c) SFSO50, and (d) SFSO75.

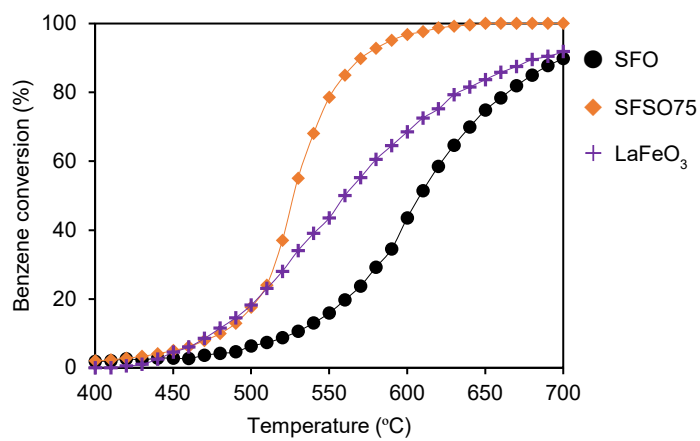

Fig. S4 Light-off curves for catalytic combustion of benzene over SFO, SFSO75, and LaFeO<sub>3</sub>.

LaFeO<sub>3</sub> was prepared by the polymerized complex method and calcined at 1000 °C.

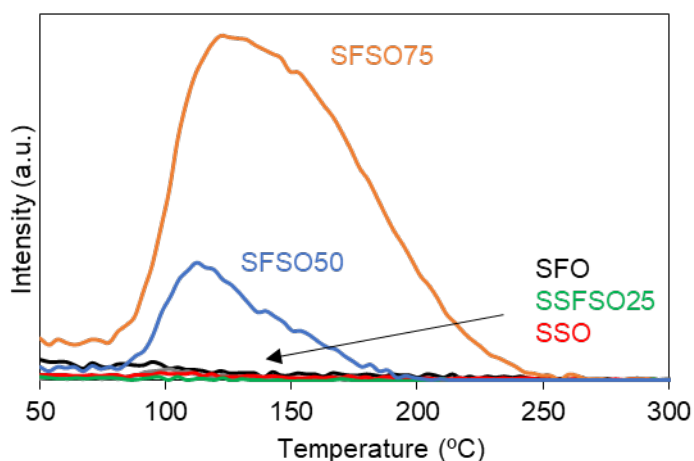

Fig. S5 Benzene-TPD profiles of (a) SFO, (b) SFSO25, (c) SFSO50, (d) SFSO75, and (e) SSO.

Benzene-TPD was conducted as follows. A powder sample (0.20 g) was heated at 700 °C for 1 h in O<sub>2</sub> flow and cooled to 50 °C. The gas flow was switched to He (10 mL/min) and the sample was left at the same temperature for 0.5 h. Then, benzene/He (1%, 10 mL/min) was fed for 0.5 h to saturate the adsorption. The gas flow was switched to He (10 mL/min) and weakly adsorbed benzene was purged for 0.5 h. Then, the temperature was increased at a ramp rate of 10 °C/min to 300 °C and benzene in the effluent gas was monitored by a quadrupole spectrometer ( $m/z = 78$ ).

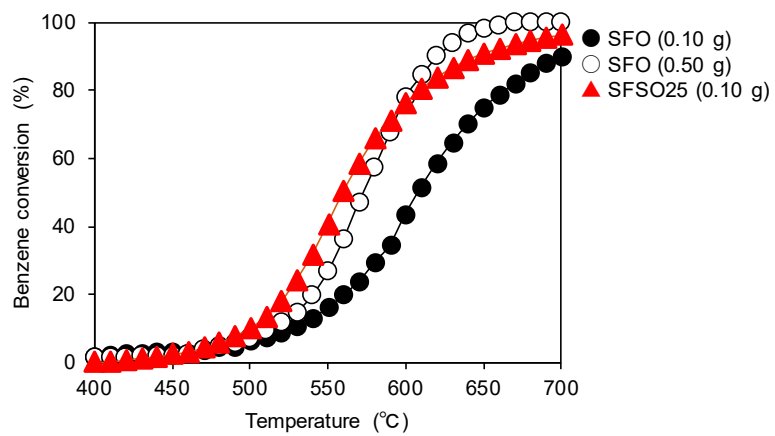

Fig. S6 Temperature dependence of benzene conversion for catalytic combustion of benzene over different amount of SFO and SFSO25.



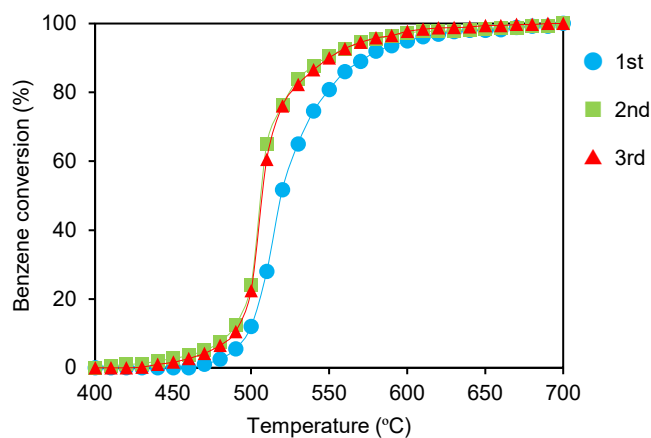

Fig. S7 Reuse of SFSO75 for combustion of benzene.

In each reaction run, only the benzene feed was stopped after the temperature reached 700 °C and the catalyst was kept at the same temperature for 30 min in O<sub>2</sub>/He flow. Then, the temperature was decreased to 100 °C in O<sub>2</sub>/He flow. The gas flow was switched to benzene/O<sub>2</sub>/He flow to start the next reaction run.
